# Supplementary material for: Winter thermodynamic vertical structure in the Arctic atmosphere linked to large scale circulation
Source: Copernicus journal article supplement (doi:10.5194/wcd-2021-41), 2021-07-02
Supplement: Supplementary file 1 [file wcd-2021-41-supplement.pdf]

## **SUPPLEMENTAL MATERIAL**

# **Winter thermodynamic vertical structure in the Arctic atmosphere linked to large scale circulation**

Tiina Nygård<sup>1</sup>, Michael Tjernström<sup>2</sup>, Tuomas Naakka<sup>1</sup>

<sup>1</sup>Finnish Meteorological Institute, Helsinki, Finland

<sup>2</sup> Department of Meteorology, and Bolin Centre for Climate Research, Stockholm University, Stockholm, Sweden

*Correspondence to:* Tiina Nygård (tiina.nygard@fmi.fi)

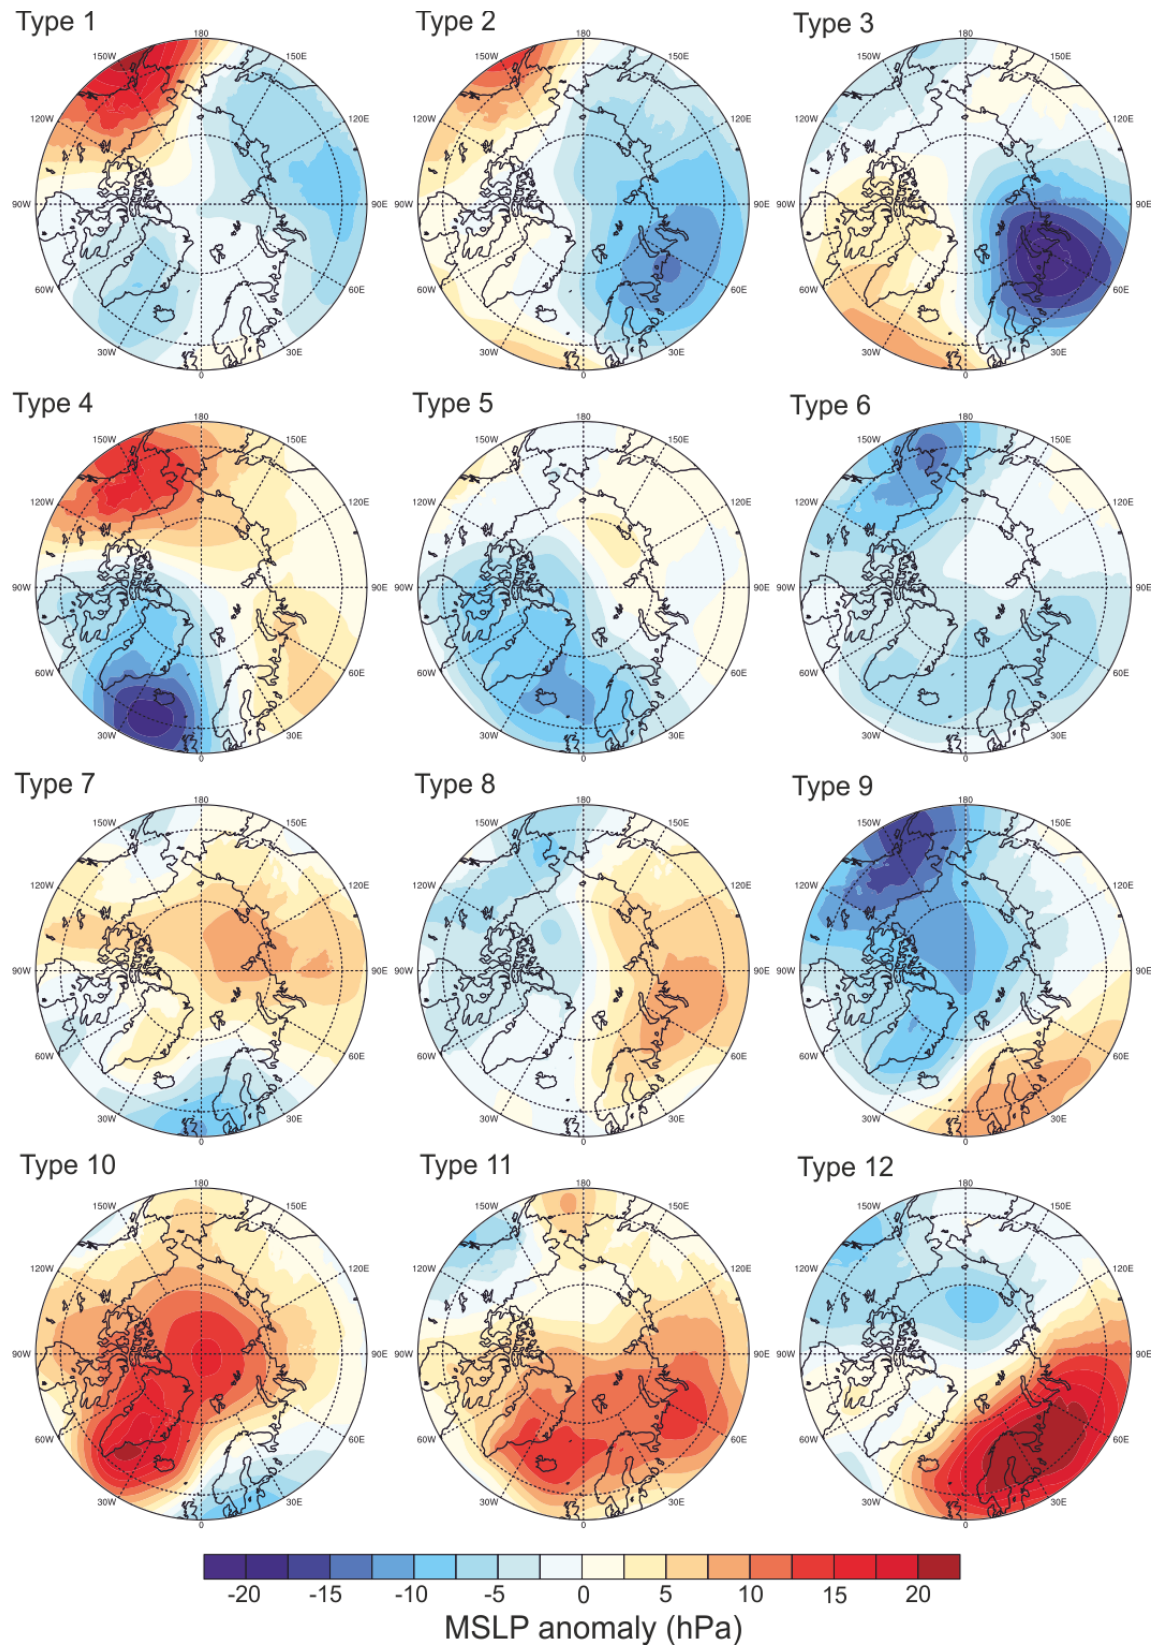

**Figure S1: Anomaly of mean sea level pressure (MSLP) averaged over the cases belonging to each of the circulation types (SOM nodes) in winters (Dec-Feb) of 2009 – 2018.**

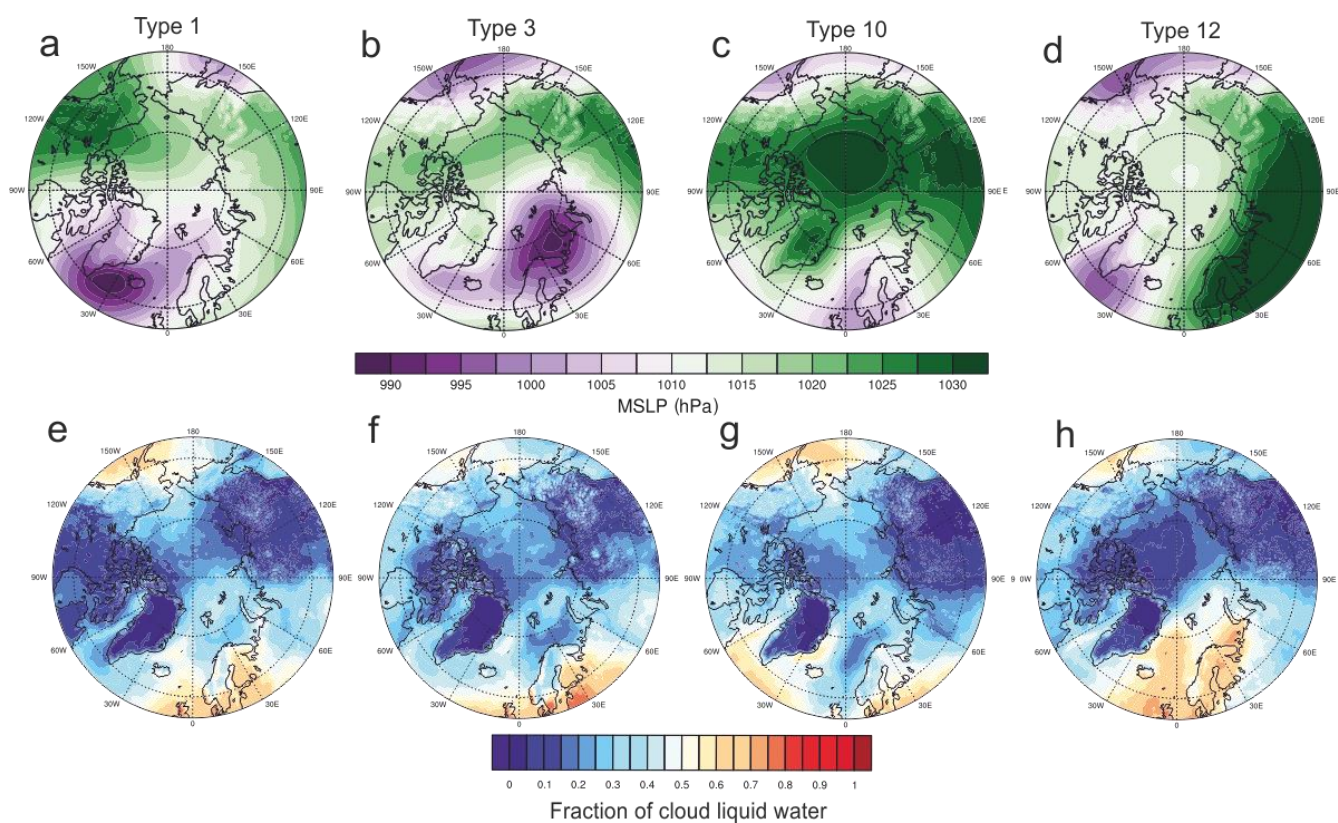

**Figure S2: Mean sea level pressure (a–d), and fraction of liquid cloud water of the total cloud water (e–h) in four SOM circulation types (indicated on the top of the column) during December–February 2009–2018 based on ERA5.**
